# Supplementary material for: Antibacterial activity of a dual peptide targeting the Escherichia coli sliding clamp and the ribosome
Source: PubMed Central journal article supplement — RSC Chem Biol. 2020 Jul 16;1(3):137–47. doi: 10.1039/d0cb00060d (PMC8341878; doi:10.1039/d0cb00060d), 2020-07-16
Supplement: CB-001-D0CB00060D-s001.pdf [file CB-001-D0CB00060D-s001.pdf]

## **Antibacterial Activity of a Dual Peptide Targeting the *Escherichia coli* Sliding Clamp and the Ribosome**

Christophe André, Florian Veillard, Philippe Wolff, Anne-Marie Lobstein, Guillaume Compain, Clément Monsarrat, Jean-Marc Reichhart, Camille Noûs, Dominique Y. Burnouf, Gilles Guichard and Jérôme E. Wagner

### **Supplementary Information**

**SI.1a:** HPLC and LCMS analyses of the different peptides synthesized

**SI.1b:** HRMS analyses of the different peptides synthesized

**SI.3:** Typical ITC titration curves describing the interaction of the different peptides with <sup>Ec</sup>SC and <sup>Ec</sup>70S

**SI.4:** Analysis of the interaction of the different peptides with <sup>Ec</sup>SC and <sup>Ec</sup>70S

**SI.5:** Whole gel images of the co-immunoprecipitation assays

**SI.6:** Survival curves of *E. coli* infected *D. melanogaster* from three independent experiments

## SI.1a: HPLC and LCMS analyses of the different peptides synthesized

### **P7:** Ac-QXDLF-OH

$M_w = 716.82 \text{ g/mol}$

LC ( $\lambda=200\text{nm}$ ): 10-100% ACN (0,1% TFA) at 25 °C for 10 min + 100% ACN for 2 min

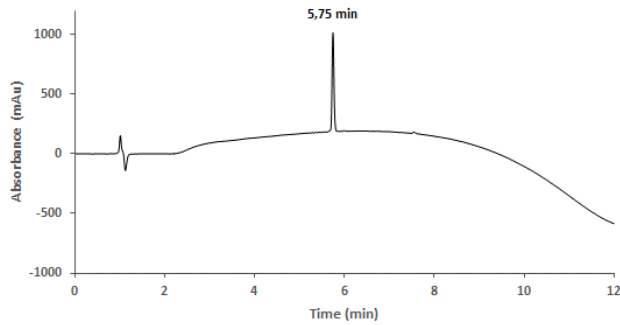

MS (ESI+)

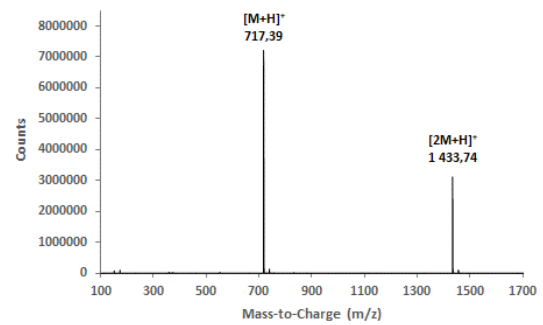

### **Py-P7:** VDKGSYLPRPTPPRPIYNRNGPRQXDLF-OH

$M_w = 3307.82 \text{ g/mol}$

LC ( $\lambda=200\text{nm}$ ): 0-60% ACN (0,1% TFA) at 50 °C for 10 min + 100% ACN for 2 min

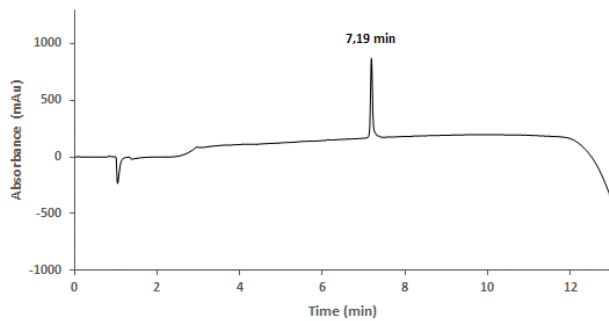

MS (ESI+)

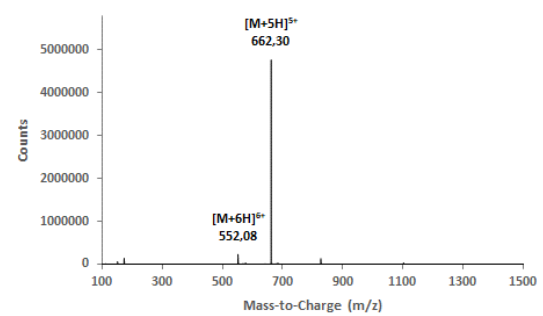

### **Py-P7Scr:** VDKGSYLPRPTPPRPIYNRNGPRXFQLD-OH

$M_w = 3307.82 \text{ g/mol}$

LC ( $\lambda=200\text{nm}$ ): 5-60% ACN (0,1% TFA) at 50 °C for 10 min + 100% ACN for 2 min

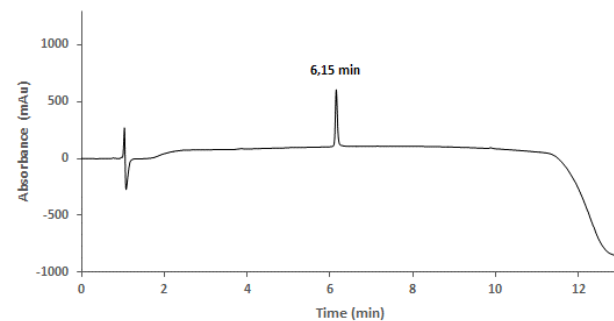

MS (ESI+)

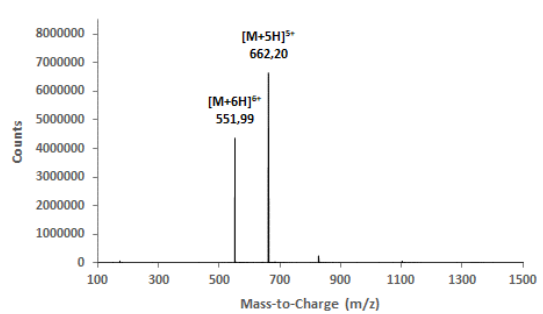

**FITC-Py:** FITC-KVDKGSYLPRPTPPRPIYNRN-NH<sub>2</sub>

M<sub>w</sub> = 2826.17 g/mol

LC (λ=200nm): 5-60% ACN (0,1% TFA) at 50 °C for 10 min + 100% ACN for 2 min

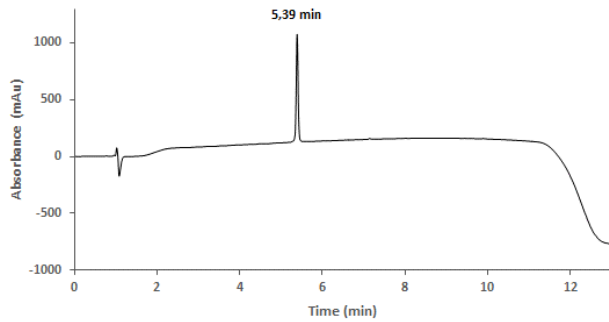

MS (ESI+)

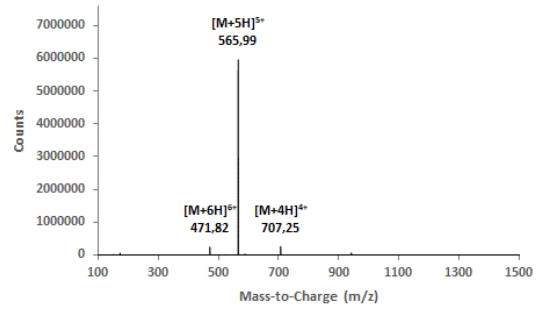

**FITC-Py-P7:** FITC-KVDKGSYLPRPTPPRPIYNRNGPRQXDLF-OH

M<sub>w</sub> = 3794.30 g/mol

LC (λ=200nm): 0-60% ACN (0,1% TFA) at 50 °C for 10 min + 100% ACN for 2 min

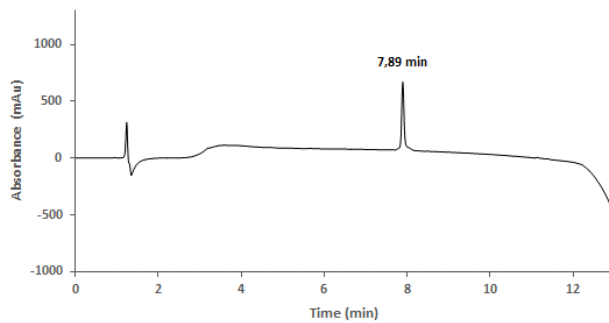

MS (ESI+)

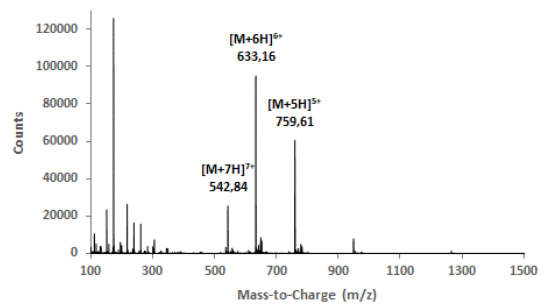

**FITC-Py-P7Scr:** FITC-KVDKGSYLPRPTPPRPIYNRNGPRXFQLD-OH

M<sub>w</sub> = 3794.30 g/mol

LC (λ=200nm): 5-60% ACN (0,1% TFA) at 50 °C for 10 min + 100% ACN for 2 min

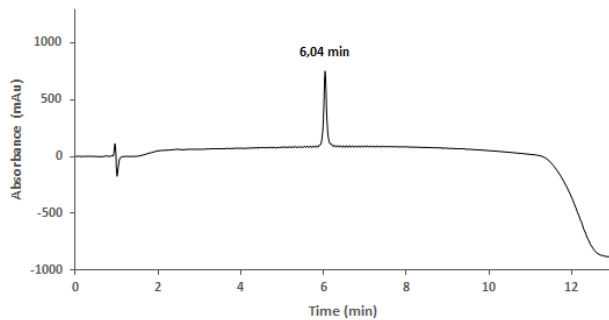

MS (ESI+)

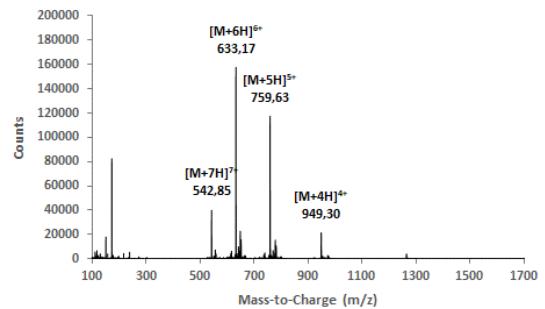

**Onc112-P7**: VDKPPYLPRRPPRRrIYNrNGPRQXDLF-OH

$M_w = 3472.08$  g/mol

LC ( $\lambda=200$ nm): 5-60% ACN (0,1% TFA) at 50 °C for 10 min + 100% ACN for 2 min

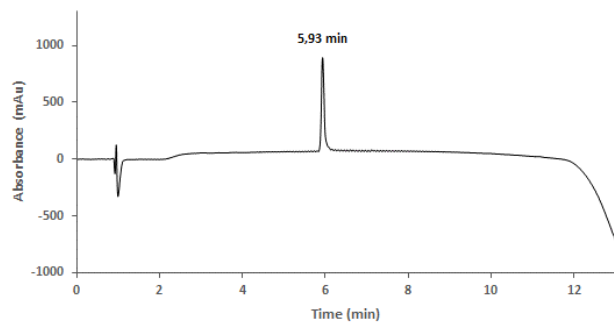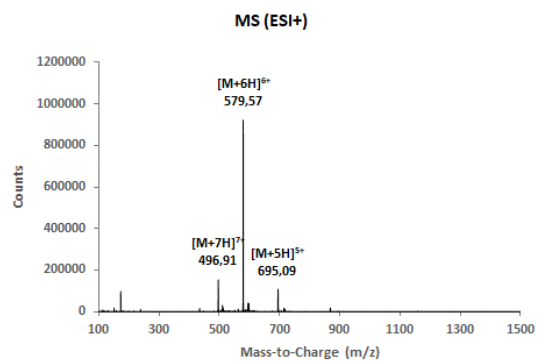

**Onc112-P7Scr**: VDKPPYLPRRPPRRrIYNrNGPRXFQLD-OH

$M_w = 3472.08$  g/mol

LC ( $\lambda=200$ nm): 5-60% ACN (0,1% TFA) at 50 °C for 10 min + 100% ACN for 2 min

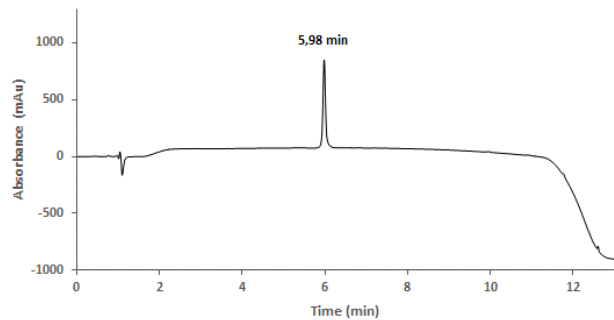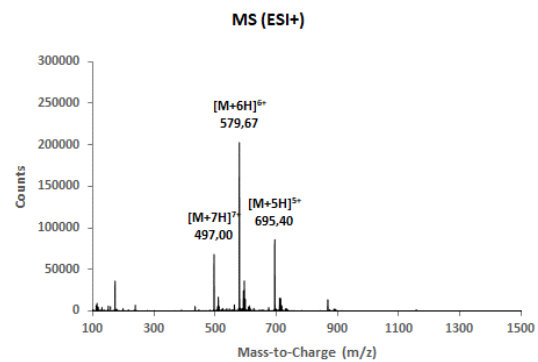

### SI.1b: HRMS analyses of the peptides synthesized

#### Py-P7: VDKGSYLPRPTPPRPIYNRNGPRQXDLF-OH (C<sub>151</sub>H<sub>236</sub>N<sub>44</sub>O<sub>40</sub>)

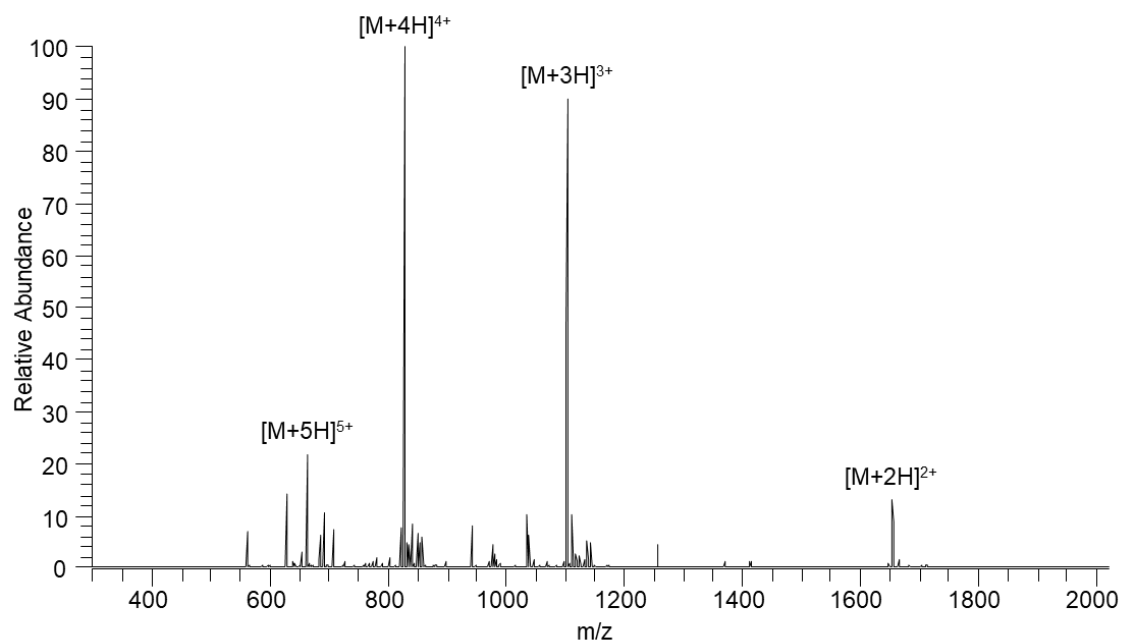

ESI+ HRMS (m/z): calcd 1653.89655 found 1653.89419 [M + 2H]<sup>2+</sup>, calcd 1102.93346 found 1102.93591 [M + 3H]<sup>3+</sup>, calcd 827.45191 found 827.45316 [M + 4H]<sup>4+</sup>, and calcd 662.16299 found 662.16265 [M + 5H]<sup>5+</sup>.

#### Py-P7Scr: VDKGSYLPRPTPPRPIYNRNGPRXFQLD-OH (C<sub>151</sub>H<sub>236</sub>N<sub>44</sub>O<sub>40</sub>)

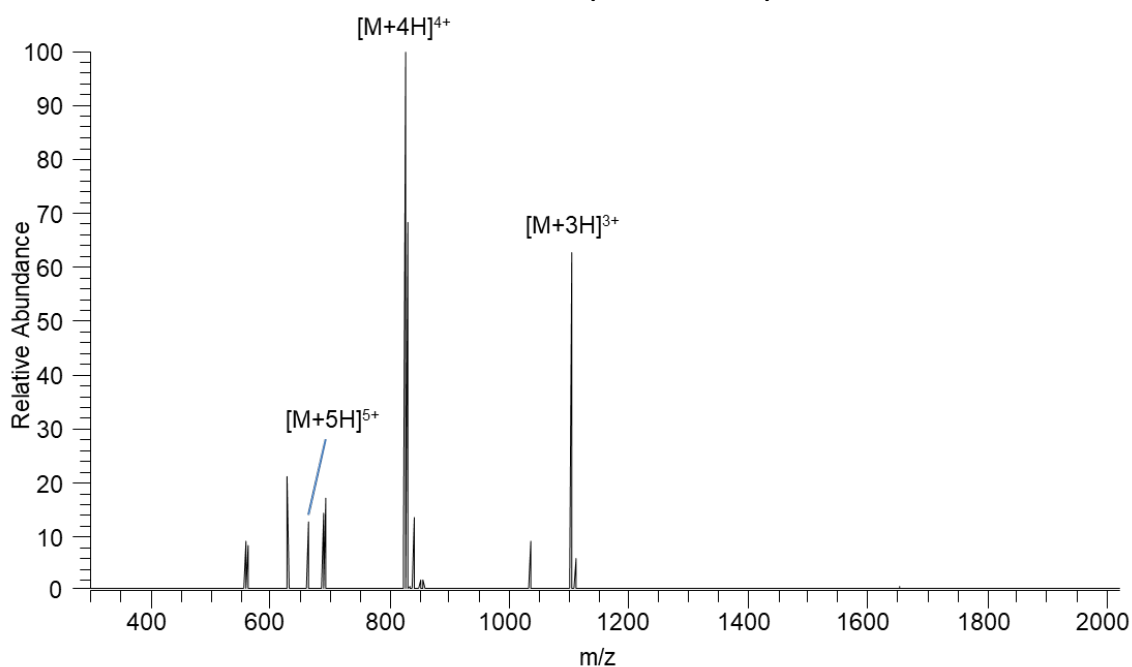

ESI+ HRMS (m/z): calcd 1102.93346 found 1102.94511 [M + 3H]<sup>3+</sup>, calcd 827.45191 found 827.46011 [M + 4H]<sup>4+</sup>, and calcd 662.16299 found 662.16796 [M + 5H]<sup>5+</sup>.

**FITC-Py: FITC-KVDKGSYLPRPTPPRPIYNRN-NH<sub>2</sub> (C<sub>132</sub>H<sub>189</sub>N<sub>35</sub>O<sub>35</sub>)**

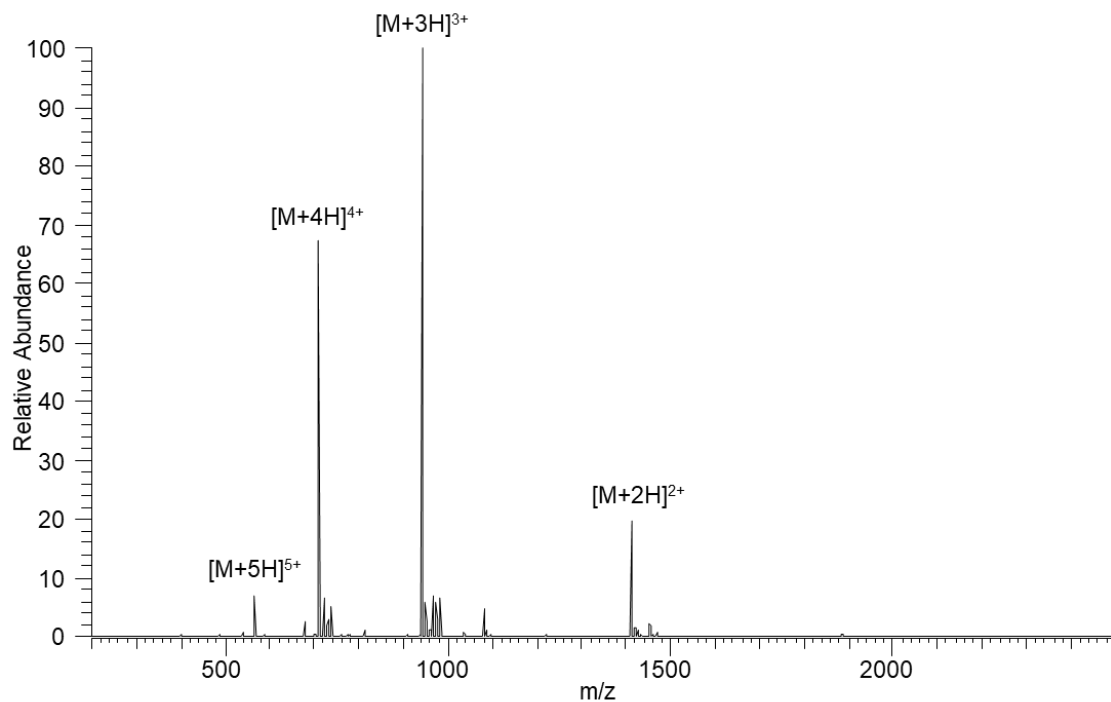

ESI+ HRMS (m/z): calcd 1413.21154 found 1413.20845 [M + 2H]<sup>2+</sup>, calcd 942.47679 found 942.47697 [M + 3H]<sup>3+</sup>, calcd 707.10941 found 707.10943 [M + 4H]<sup>4+</sup>, and calcd 565.88898 found 565.88725 [M + 5H]<sup>5+</sup>.

**FITC-Py-P7: FITC-KVDKGSYLPRPTPPRPIYNRNGPRQXDLF-OH (C<sub>178</sub>H<sub>258</sub>N<sub>46</sub>O<sub>47</sub>)**

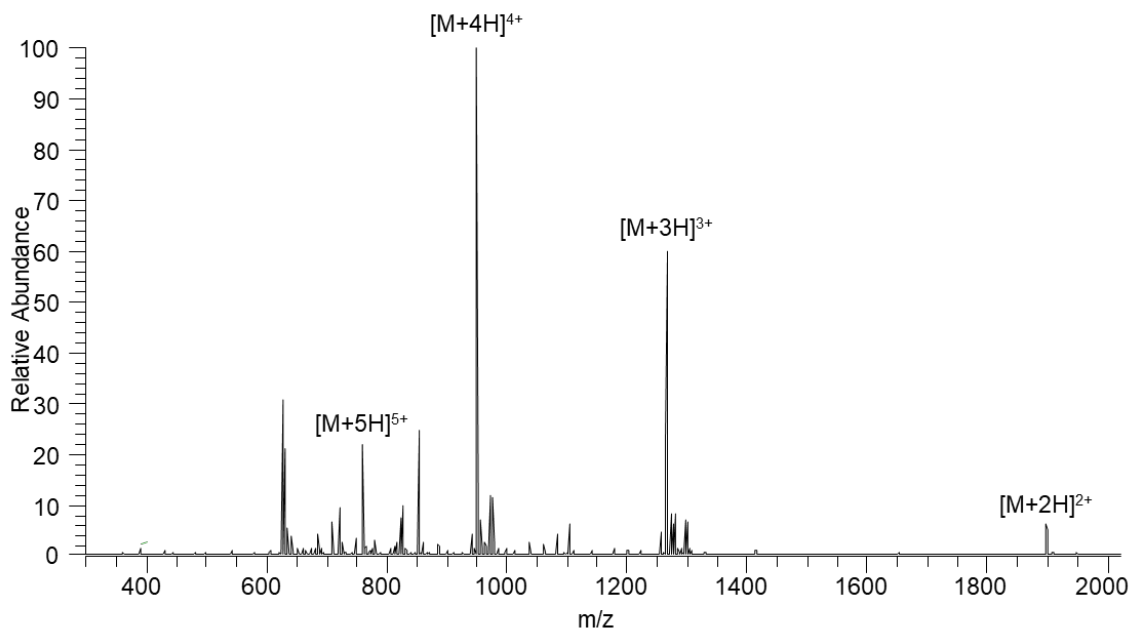

ESI+ HRMS (m/z): calcd 1896.96790 found 1896.97197 [M + 2H]<sup>2+</sup>, calcd 1264.98103 found 1264.98645 [M + 3H]<sup>3+</sup>, calcd 948.98759 found 948.99303 [M + 4H]<sup>4+</sup>, and calcd 759.39153 found 759.39403 [M + 5H]<sup>5+</sup>.

**FITC-Py-P7Scr: FITC-KVDKGSYLPRPTPPRPIYNRNGPRXFQLD-OH (C<sub>178</sub>H<sub>258</sub>N<sub>46</sub>O<sub>47</sub>)**

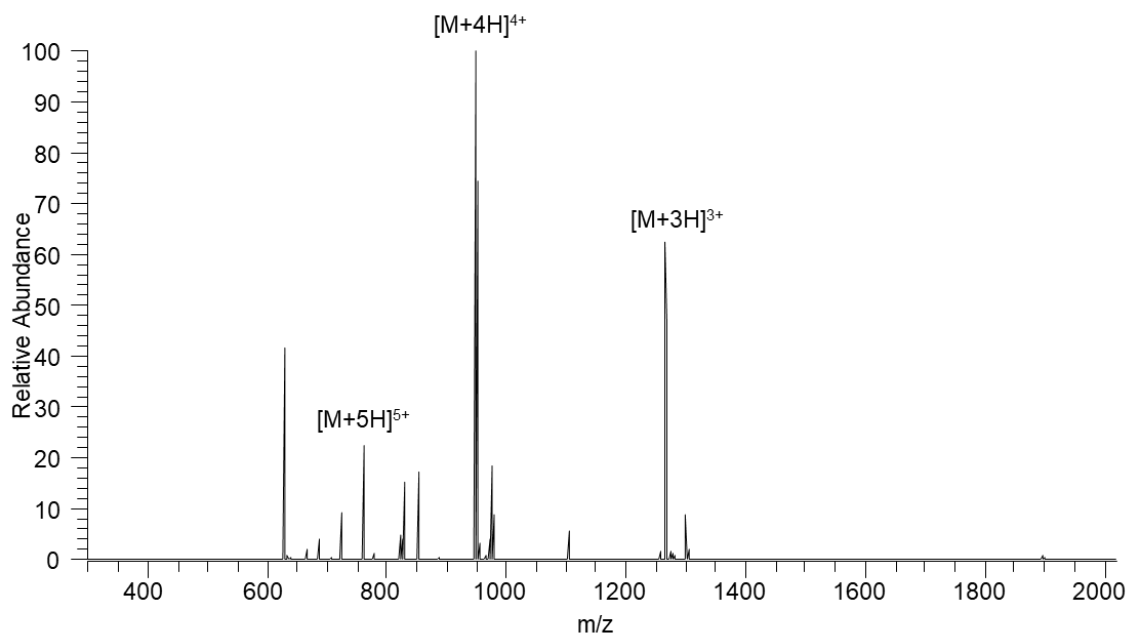

ESI+ HRMS (m/z): calcd 1264.98103 found 1264.99860 [M + 3H]<sup>3+</sup>, calcd 948.98759 found 949.00171 [M + 4H]<sup>4+</sup>, and calcd 759.39153 found 759.40126 [M + 5H]<sup>5+</sup>.

**Onc112-P7: VDKPPYLPRPRPPRrIYNrNGPRQXDLF-OH (C<sub>159</sub>H<sub>252</sub>N<sub>50</sub>O<sub>38</sub>)**

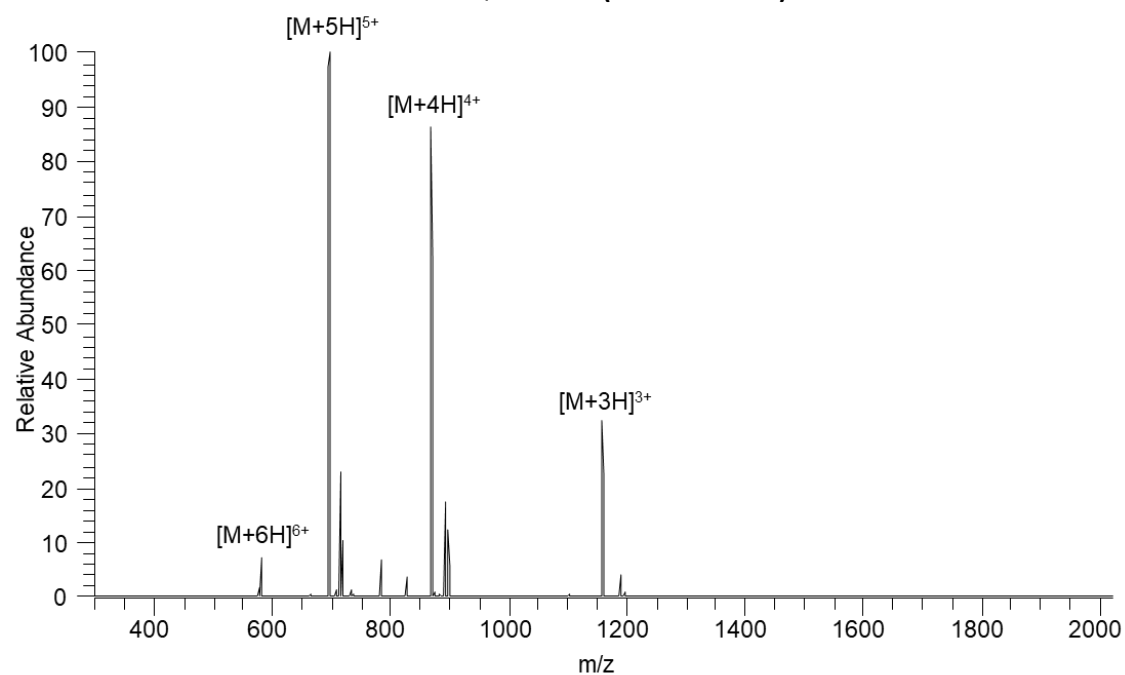

ESI+ HRMS (m/z): calcd 1157.65140 found 1157.66745 [M + 3H]<sup>3+</sup>, calcd 868.49037 found 868.50388 [M + 4H]<sup>4+</sup>, calcd 694.99375 found 695.00511 [M + 5H]<sup>5+</sup> and calcd 579.32934 found 579.33641 [M + 6H]<sup>6+</sup>.

**Onc112-P7Scr: VDKPPYLPRPRPPRrIYNrNGPRXFQLD-OH (C<sub>159</sub>H<sub>252</sub>N<sub>50</sub>O<sub>38</sub>)**

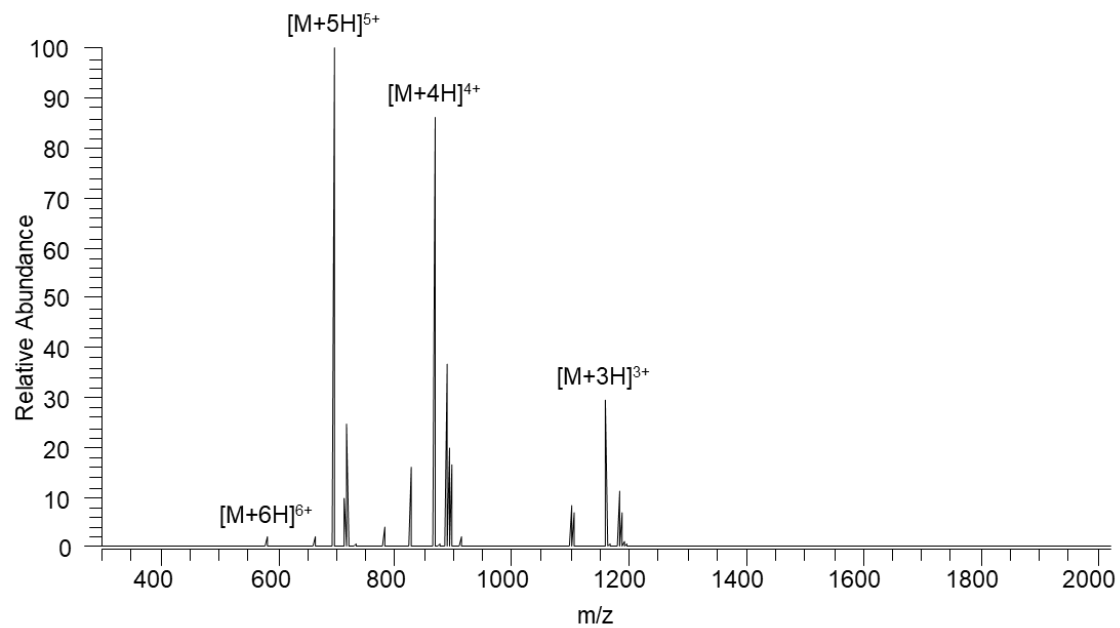

ESI+ HRMS (m/z): calcd 1157.65140 found 1157.66618 [M + 3H]<sup>3+</sup>, calcd 868.49037 found 868.50235 [M + 4H]<sup>4+</sup>, calcd 694.99375 found 695.00344 [M + 5H]<sup>5+</sup> and calcd 579.32934 found 579.33445 [M + 6H]<sup>6+</sup>.



**SI.2:** Thermodynamic profiles describing the interaction of the different peptides used with  $^{Ec}SC$  and  $^{Ec}70S$  at 30°C

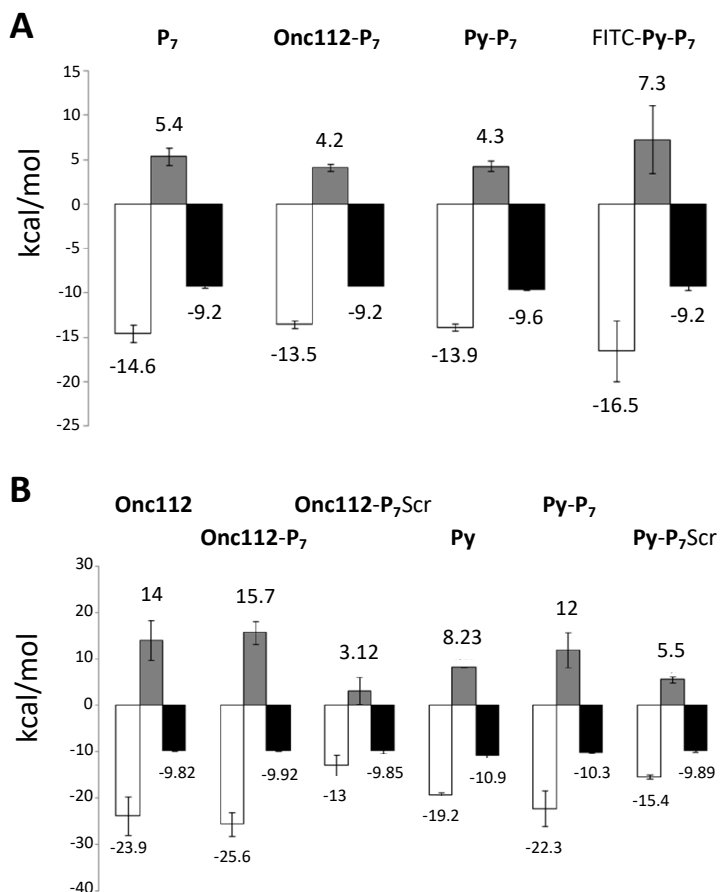

**Fig. SI.2:** (A): Interaction of  $P_7$ , Onc112- $P_7$ , Py- $P_7$  and FITC-Py- $P_7$  with  $^{Ec}SC$  at 30°C. (B): Interaction of Onc112, Onc112- $P_7$ , Onc112- $P_7Scr$ , Py, Py- $P_7$  and Py- $P_7Scr$  with  $^{Ec}70S$  at 30°C.  $\Delta H$ ,  $-T\Delta S$  and  $\Delta G$  (all in kcal/mol) are white, grey and black bars, respectively. Thermodynamic values are indicated for each bar. The interaction of  $P_7$  with  $^{Ec}SC$  (Fig. SI.2 A) is a spontaneous enthalpy driven process as previously observed<sup>1</sup>. The unfavorable entropic factor can be partly related to the loss of freedom degrees due to peptide binding. The interaction of all peptides with  $^{Ec}70S$  is also an enthalpy driven process (Fig. SI.2 B). It is characterized by an unfavorable entropic factor ( $-T\Delta S$ ) that could be partly attributed to the loss of freedom degrees of the peptide upon binding into the 70S particle' PEC, and a Gibb's free energy that ranges around -10 kcal/mole, indicating the spontaneous nature of the interaction.

### SI.3: Typical ITC titration curves describing the interaction of the different peptides with $E^cSC$ and $E^c70S$

This section presents typical ITC titration curves of the interaction of  $E^cSC$  and  $E^c70S$  with the different peptides used in this study (Table 1 in the main text). All experiments were performed at 30°C. ITC raw data were treated by the AFFINImeter program online (<https://www.affinimeter.com>). Titration curves presented on the left column correspond to the ligand injection into the protein or ribosome solution. Titration curves on the right correspond to the ligand injection into buffer (ligand dilution control).

#### Interaction with $E^{cwt}SC$

##### A. $E^cSC/P_7$

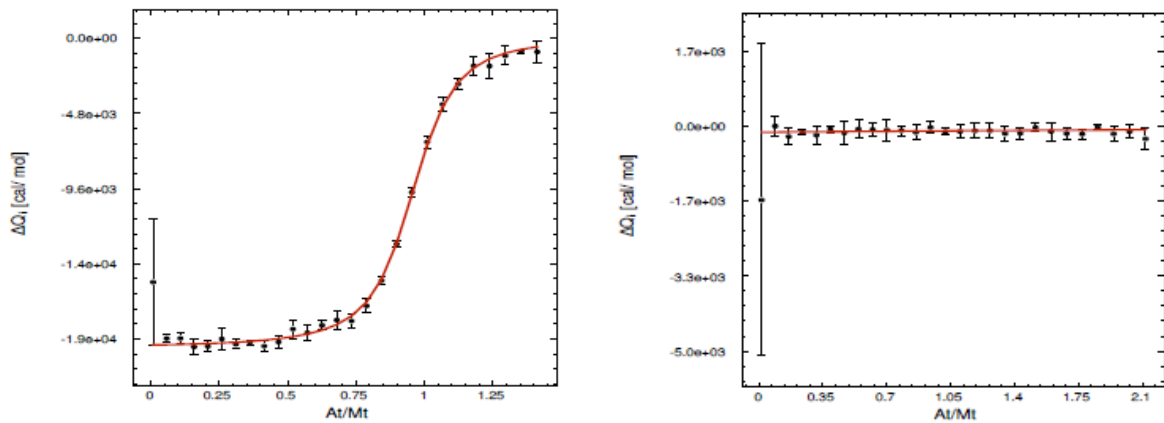

##### B. $E^cSC/Onc112$

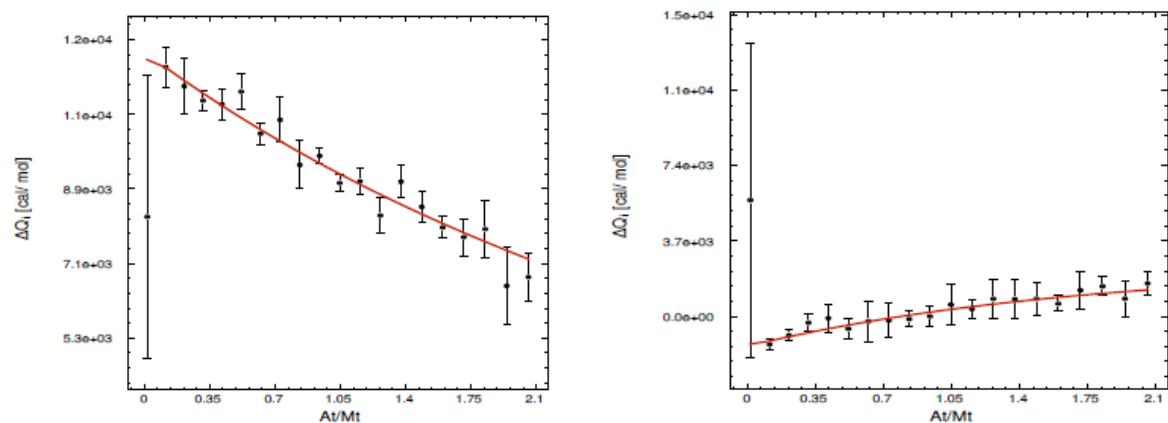

### C. $E^{cSC}/Onc112-P_7$

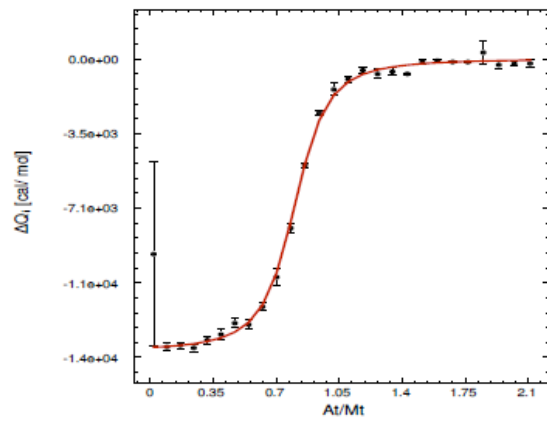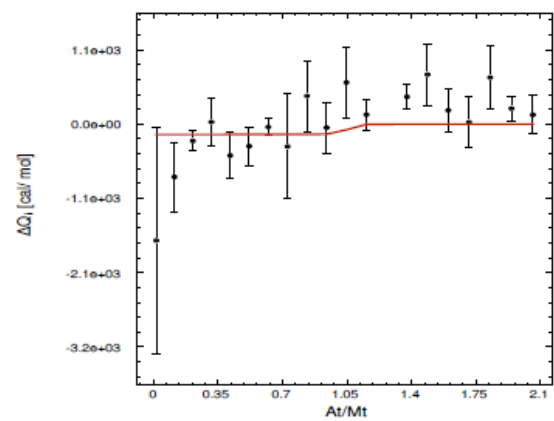

### D. $E^{cSC}/Onc112-P_7Scr$

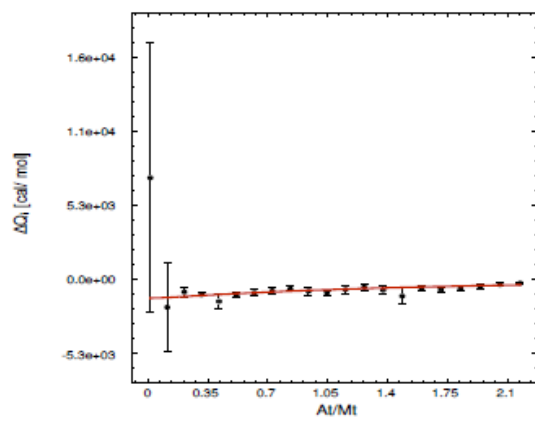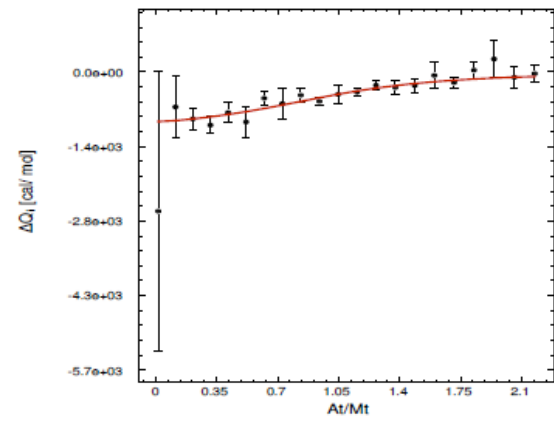

### E. $E^{cSC}/Py$

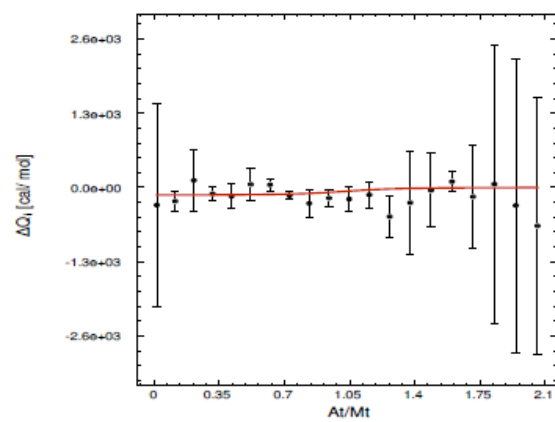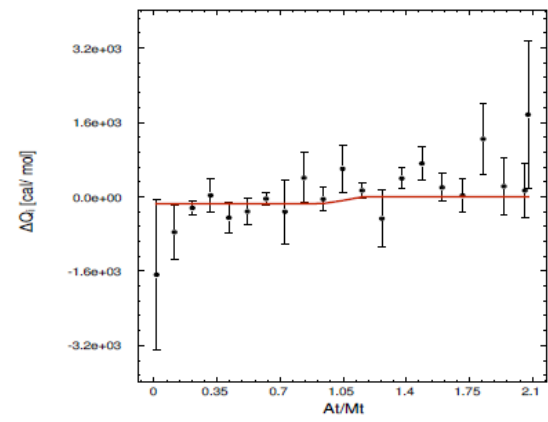

### F. $^{EC}SC/Py-P_7$

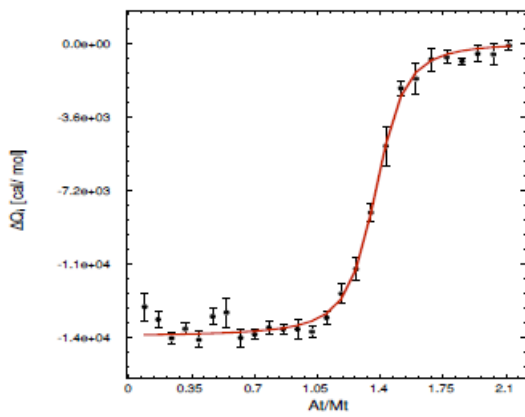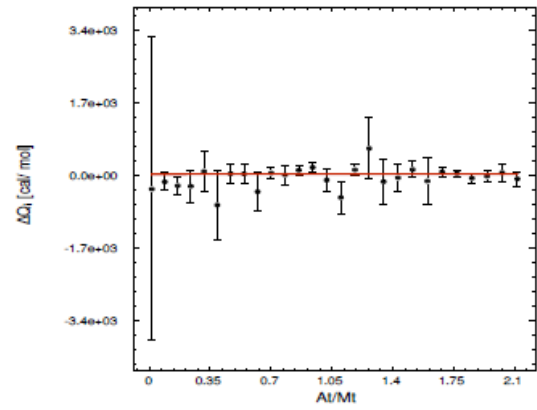

### G. $^{EC}SC/Py-P_7Scr$

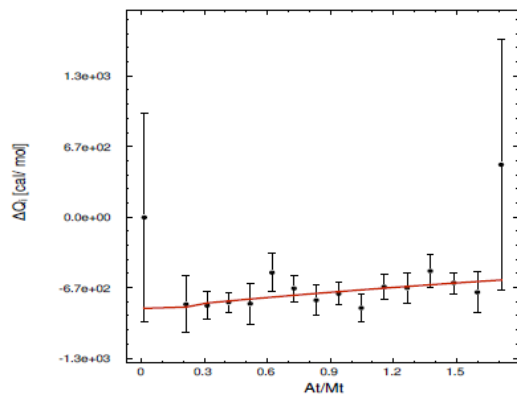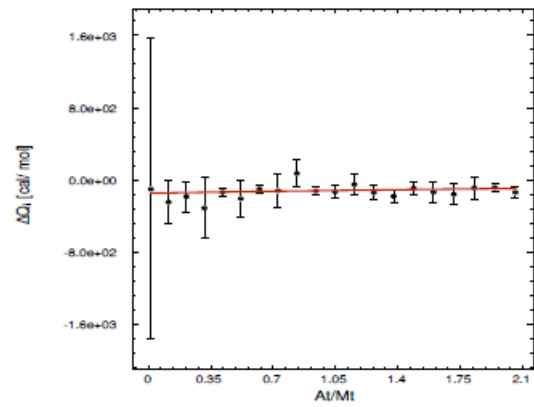

### H. $^{EC}SC/FITC-Py$

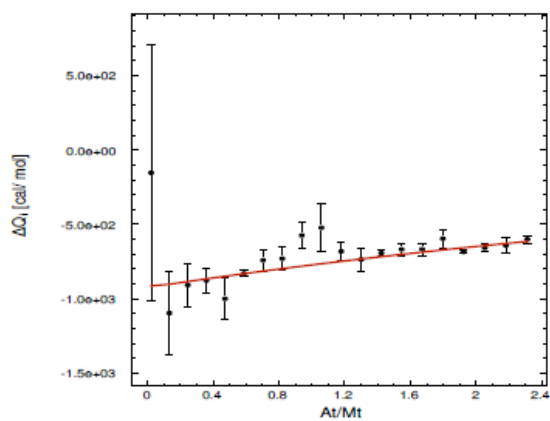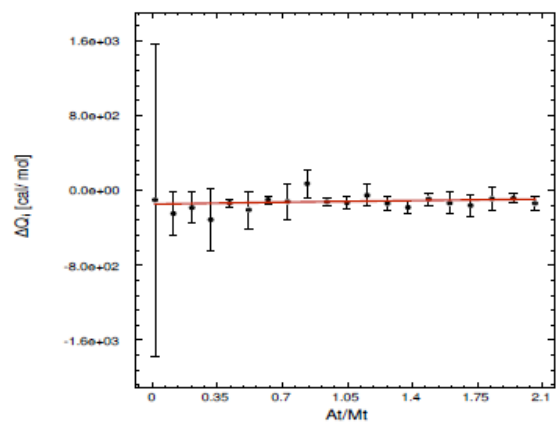

### I. *Ec*SC/FITC-Py-P<sub>7</sub>

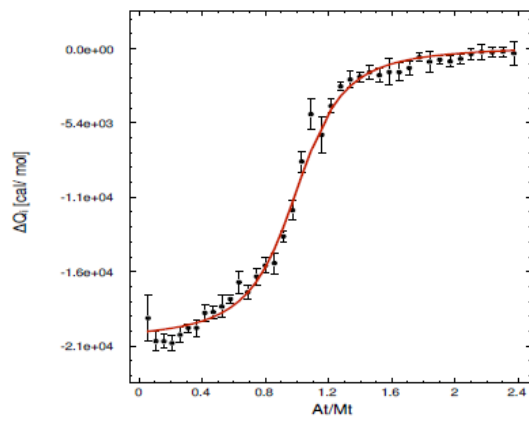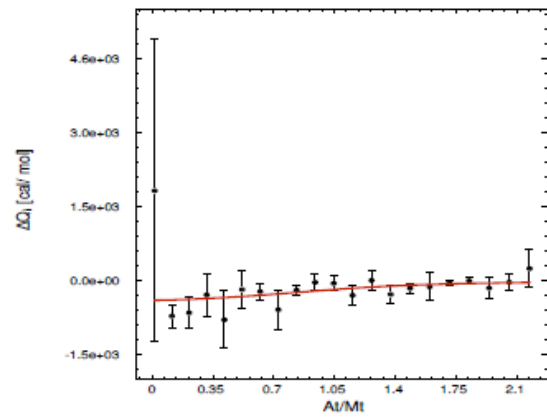

### J. *Ec*SC/FITC-Py-P<sub>7</sub>Scr

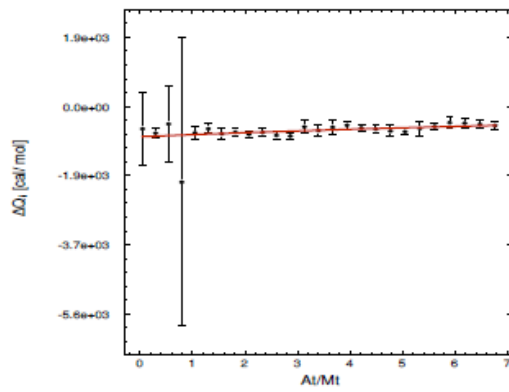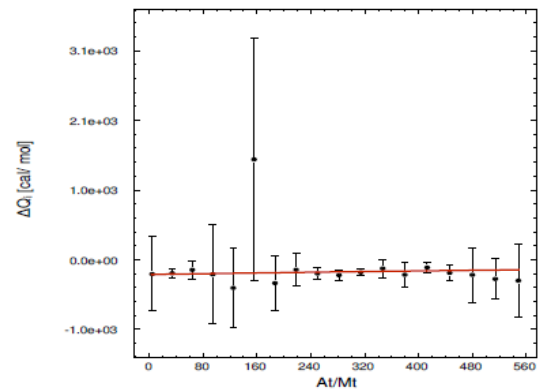

### Interaction with *Ec*70S

#### K. *Ec*70S /P<sub>7</sub>

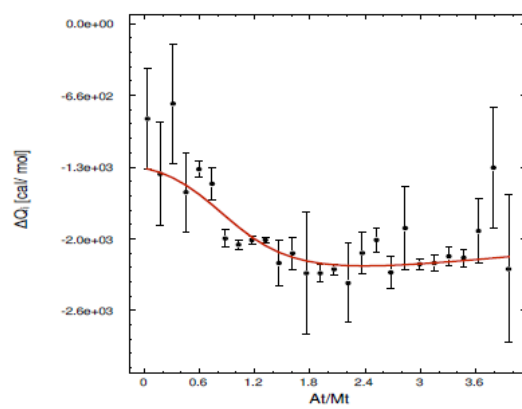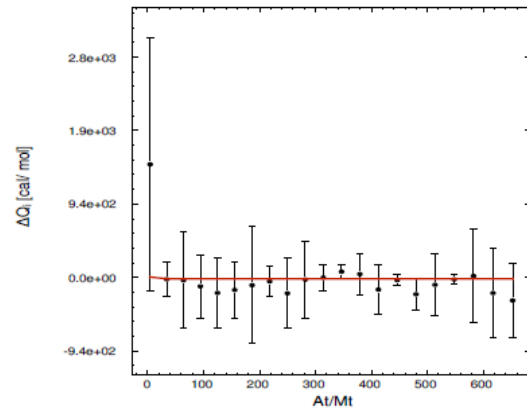

L. *Ec70S* /Onc112

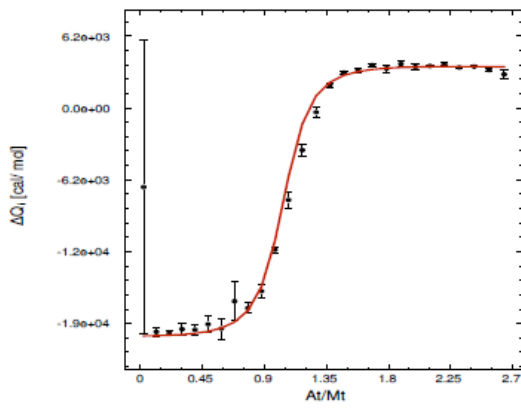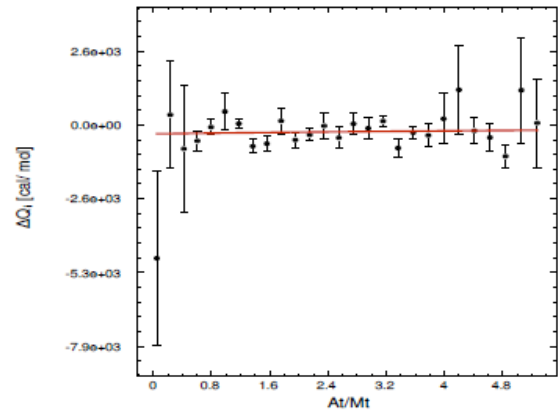

M. *Ec70S* /Onc112-P<sub>7</sub>

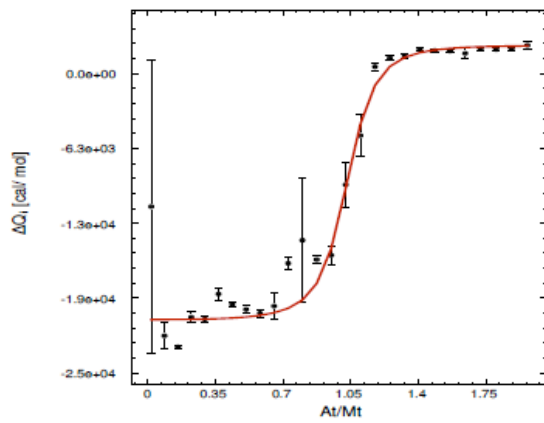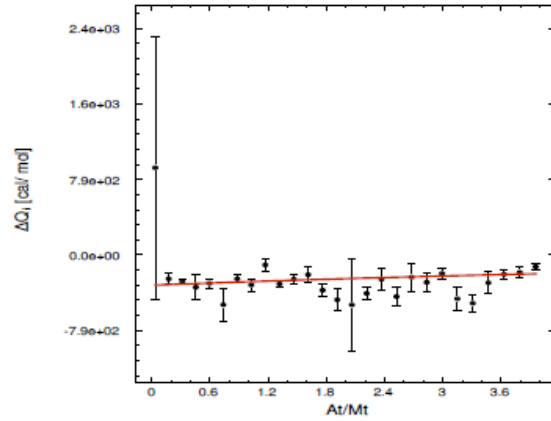

N. *Ec70S* /Onc112-P<sub>7</sub>Scr

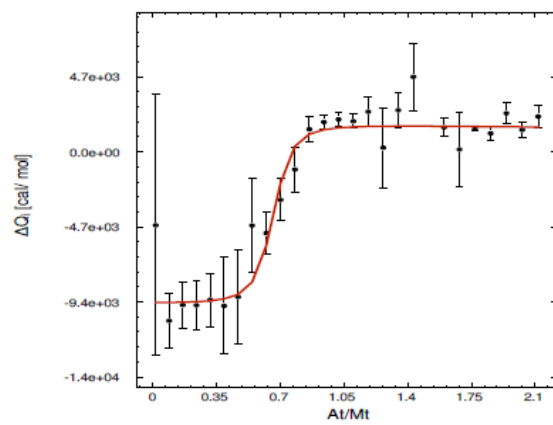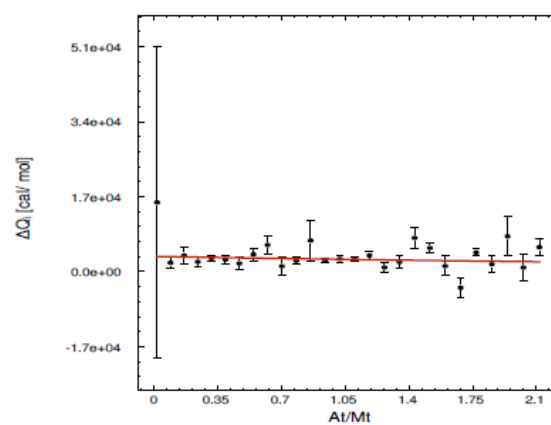

O.  $^{Ec}70S/Py$

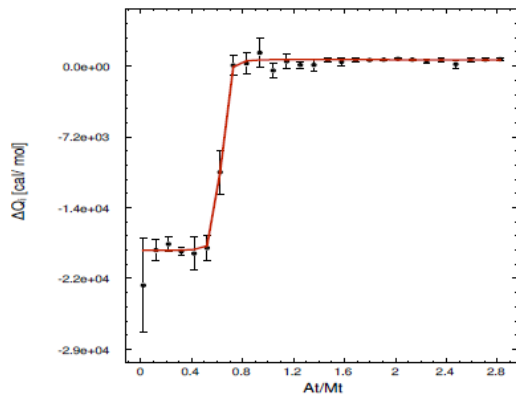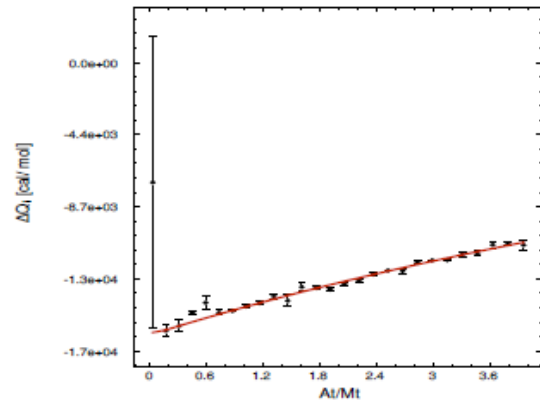

P.  $^{Ec}70S/Py-P_7$

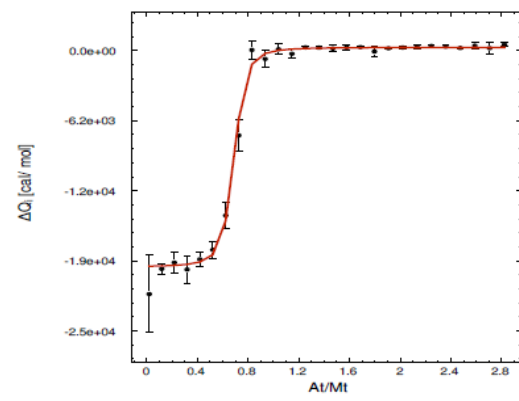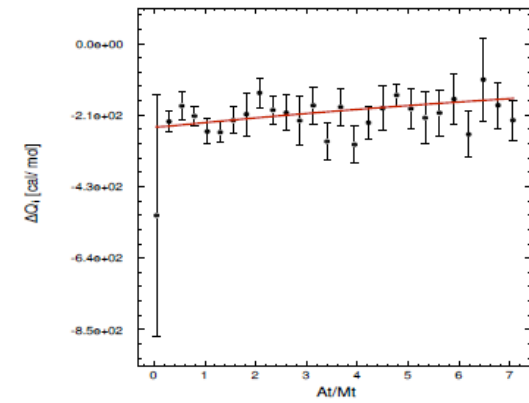

Q.  $^{Ec}70S/Py-P_7Scr$

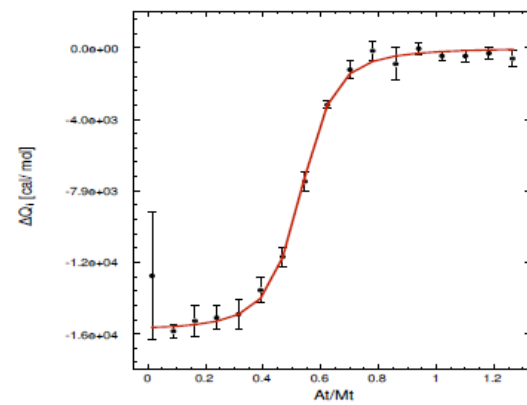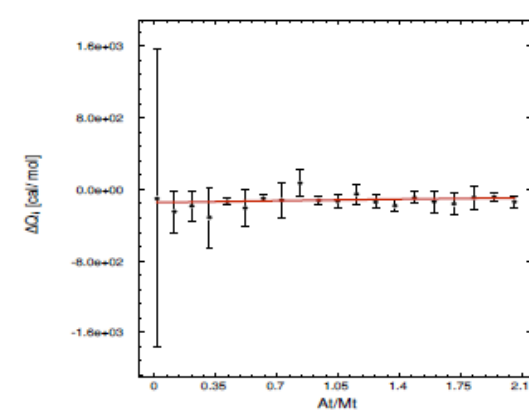

### R. *Ec70S* /FITC-Py

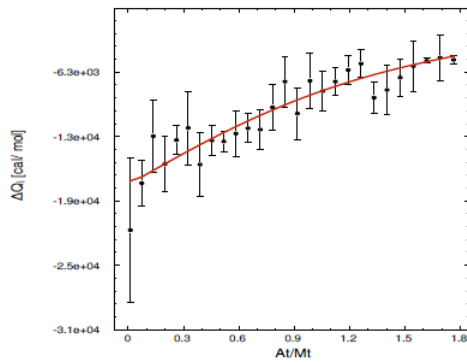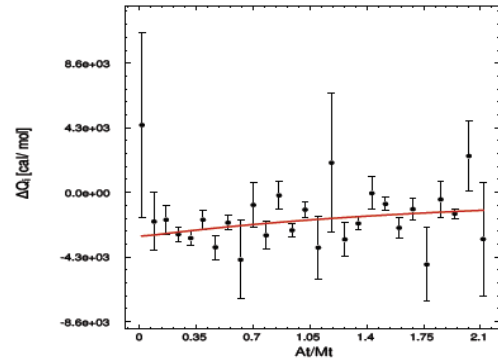

### S. *Ec70S* /FITC-Py-P<sub>7</sub>

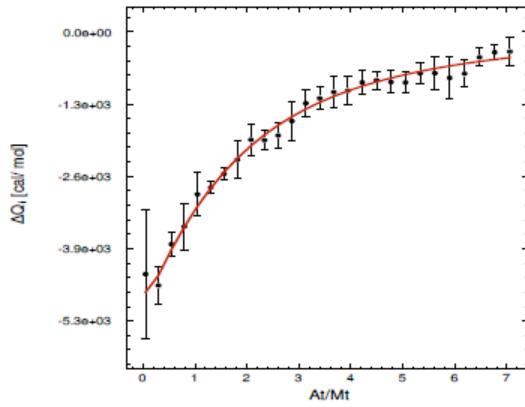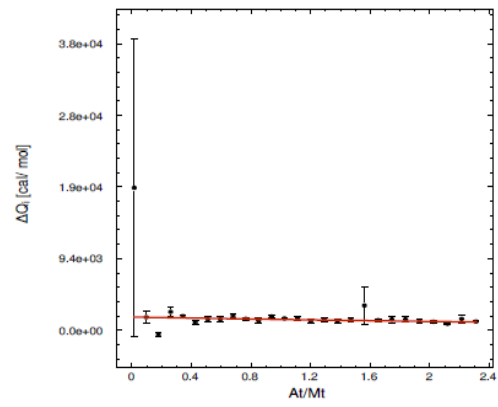

### T. *Ec70S* /FITC-Py-P<sub>7</sub>Scr

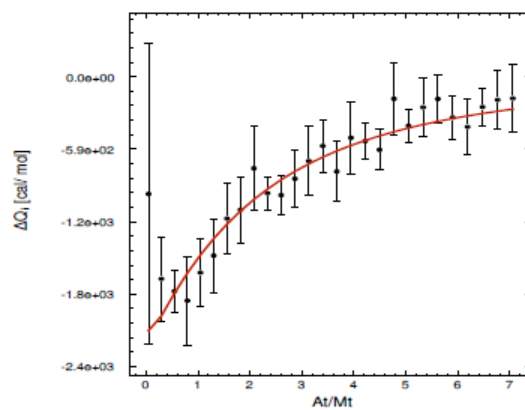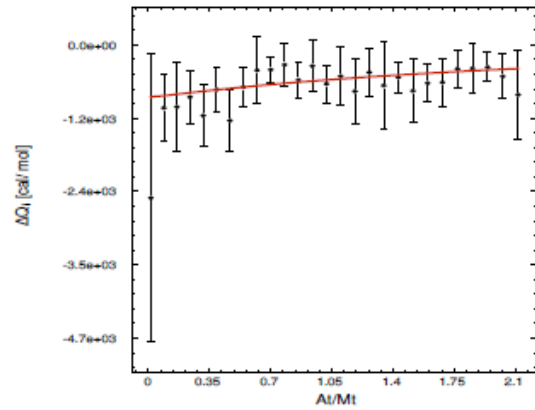



#### SI.4: Interaction of the different peptides with <sup>Ec</sup>SC and <sup>Ec</sup>70S

The peptide interactions with their respective targets were monitored by ITC at 30°C. **P<sub>7</sub>** interacts with <sup>Ec</sup>SC (Table SI.4 A, SI.3 A) as already observed in previous studies<sup>1,2</sup> but PrAMPs **Onc112** and **Py** do not (Table SI.4 A; SI.3 B and E). However, the fusion peptides, resulting from the C-terminal addition of **P<sub>7</sub>** to each PrAMP, *i.e.* **Onc112-P<sub>7</sub>** and **Py-P<sub>7</sub>**, interact with <sup>Ec</sup>SC as efficiently as **P<sub>7</sub>** alone, as indicated by the similar thermodynamic profiles (Table SI.4 A, Fig. SI.2 A and SI.3 C and F). In addition, these fusion peptides have a slightly increased affinity for <sup>Ec</sup>SC as compared to **P<sub>7</sub>** (Table SI.4 A), which may result from additional interactions established by PrAMPs or linker residues, as previously observed for the linker R residue<sup>3</sup>. Control fusion peptides, **Onc112-P<sub>7</sub>Scr** and **Py-P<sub>7</sub>Scr** with a scrambled variant of **P<sub>7</sub>**<sup>1</sup> (**P<sub>7</sub>Scr**, XFQLD, X = cyclohexylalanyl, Cha) fail to interact with <sup>Ec</sup>SC (SI.3 D and G). The labeled fusion peptide FITC-**Py-P<sub>7</sub>** similarly interacts with <sup>Ec</sup>SC when compared to the unlabeled peptides **P<sub>7</sub>** and **Py-P<sub>7</sub>** (Table 2 A, Fig. SI.2 A and SI.3 I). As expected from experiments with their unlabeled counterparts, the two other fluorescent peptides, FITC-**Py** and FITC-**Py-P<sub>7</sub>Scr** do not interact with <sup>Ec</sup>SC (SI.3 H and J).

The interaction of each peptide with the <sup>Ec</sup>70S ribosomal particle was also characterized by ITC (Table SI.4 B, Fig. SI.2 B and SI.3 K-T). While **P<sub>7</sub>** does not bind to <sup>Ec</sup>70S, PrAMPs interact with high affinity with their target (Table SI.4 B, SI.3 L and O), with *K<sub>D</sub>* values in the order of 84 nM and 15 nM for **Onc112** and **Py**, respectively. The fusion peptides **Onc112-P<sub>7</sub>** and **Py-P<sub>7</sub>** also efficiently interact with <sup>Ec</sup>70S, similarly to their cognate monofunctional peptides (Table SI.4 B, Fig. SI.2 B and SI.3 M and P).

Although **Onc112** and **Py** present similar thermodynamic profiles, indicating an overall similar mode of interaction, their respective thermodynamic values are significantly different (Table SI.4 B). This suggests some differences between peptide interactions within the PEC and correlate with structural data where 16 **Py** residues, but only 12 for **Onc112**, are modeled in the *Thermus thermophilus* PEC (PDB ID: 5FUV)<sup>4</sup>, indicating that **Py** might be more stable than **Onc112**. Unfortunately, the crystal structure does not identify additional contacts for **Py** that could account for the difference in thermodynamic parameters<sup>4</sup>. These differences are no longer observed with the corresponding bi-functional peptides **Onc112-P<sub>7</sub>** and **Py-P<sub>7</sub>**. Moreover, the **P<sub>7</sub>** sequence does not alter the interaction of the PrAMPs with the ribosome (Table SI.4 B, Fig. SI.2 B, SI.3 M and P).

A

|                           | P7                    | Onc<br>112 | Onc<br>112-P7           | Onc<br>112-P7Scr | Py | Py-P7                  | Py-P7Scr | FITC-Py | FITC-Py-<br>P7         | FITC-<br>Py-<br>P7Scr |
|---------------------------|-----------------------|------------|-------------------------|------------------|----|------------------------|----------|---------|------------------------|-----------------------|
| $\Delta H$ (kcal/mole)    | -14.6<br>( $\pm 1$ )  | Ni         | -13.5<br>( $\pm 0.4$ )  | Ni               | Ni | -13.9<br>( $\pm 0.4$ ) | Ni       | Ni      | -16.5<br>( $\pm 3.4$ ) | Ni                    |
| $-\Delta S$ (kcal/mole)   | 5.4<br>( $\pm 1$ )    | Ni         | 4.2<br>( $\pm 0.4$ )    | Ni               | Ni | 4.3<br>( $\pm 0.5$ )   | Ni       | Ni      | 7.35<br>( $\pm 3.8$ )  | Ni                    |
| $\Delta G$<br>(kcal/mole) | -9.2<br>( $\pm 0.2$ ) | Ni         | -9.28<br>( $\pm 0.02$ ) | Ni               | Ni | -9.61<br>( $\pm 0.1$ ) | Ni       | Ni      | -9.2<br>( $\pm 0.5$ )  | Ni                    |
| $K_D$<br>(nM)             | 194 ( $\pm$<br>58)    | Ni         | 200<br>( $\pm 0.1$ )    | Ni               | Ni | 120<br>( $\pm 20$ )    | Ni       | Ni      | 300<br>( $\pm 30$ )    | Ni                    |
| $n$                       | 10                    | 3          | 2                       | 5                | 2  | 2                      | 2        | 2       | 4                      | 2                     |

B

|                           | P7 | Onc<br>112             | Onc<br>112-P7          | Onc<br>112-P7Scr       | Py                     | Py-P7                   | Py-P7Scr               | FITC-Py                | FITC-Py-<br>P7         | FITC-Py-<br>P7Scr      |
|---------------------------|----|------------------------|------------------------|------------------------|------------------------|-------------------------|------------------------|------------------------|------------------------|------------------------|
| $\Delta H$ (kcal/mole)    | Ni | -23.9<br>( $\pm 4.1$ ) | -25.6<br>( $\pm 2.5$ ) | -13<br>( $\pm 2.2$ )   | -19.2<br>( $\pm 0.4$ ) | -22.3<br>( $\pm 3.8$ )  | -15.4<br>( $\pm 0.4$ ) | -20.1<br>( $\pm 13$ )  | -13<br>( $\pm 6.6$ )   | -8.92<br>( $\pm .2$ )  |
| $-\Delta S$ (kcal/mole)   | Ni | 14.0<br>( $\pm 4.3$ )  | 15.7<br>( $\pm 2.4$ )  | 3.12<br>( $\pm 2.9$ )  | 8.23<br>( $\pm 0.03$ ) | 12<br>( $\pm 3.7$ )     | 5.5<br>( $\pm 0.6$ )   | 13.3<br>( $\pm 13.2$ ) | 6.7<br>( $\pm 4.8$ )   | 2.94<br>( $\pm 0.2$ )  |
| $\Delta G$<br>(kcal/mole) | Ni | -9.82<br>( $\pm 0.2$ ) | -9.92<br>( $\pm 0.1$ ) | -9.85<br>( $\pm 0.6$ ) | -10.9<br>( $\pm 0.5$ ) | -10.3<br>( $\pm 0.06$ ) | -9.89<br>( $\pm 0.2$ ) | -6.91<br>( $\pm 1.3$ ) | -6.27<br>( $\pm 0.2$ ) | -5.98<br>( $\pm 0.2$ ) |
| $K_D$<br>(nM)             | Ni | 84<br>( $\pm 20$ )     | 70<br>( $\pm 10$ )     | 100<br>( $\pm 0.9$ )   | 15<br>( $\pm 10$ )     | 37<br>( $\pm 0.3$ )     | 76<br>( $\pm 20$ )     | >10 <sup>4</sup>       | >10 <sup>4</sup>       | >10 <sup>4</sup>       |
| $n$                       | 2  | 2                      | 2                      | 2                      | 2                      | 3                       | 2                      | 4                      | 3                      | 2                      |

**Table SI.4:** A: peptides interaction with <sup>Ec</sup>SC. B: peptides interaction with <sup>Ec</sup>70S. All experiments were performed at 30°C (303.15 K). Data are means of  $n$  independent experiments. Ni: no specific interaction (see SI.3 for typical ITC titration curves).  $n$ : number of independent experiments performed.

Surprisingly enough, the enthalpic and entropic factors values drop dramatically for **Onc112-P7Scr** and **Py-P7Scr** peptides, indicating that, as compared to **P7** fusion peptides, the **P7** scrambled sequence affects the mode of interaction of the PrAMP with its ribosomal target. Nevertheless, these fusion peptides still interact with <sup>Ec</sup>70S (SI.3 N and Q), despite a slightly lower affinity (Table SI.4B). Finally, the N-terminal FITC moiety is highly deleterious for the interaction of **Py** and its derivatives with <sup>Ec</sup>70S (Table SI.4B, SI.3 R-T), indicating that this fluorescent probe strongly hinders the PrAMP entry into the PEC. The poor interaction of these labeled peptides with <sup>Ec</sup>70S precludes any serious analysis of the thermodynamic data.

### SI.5: Whole gel images of the co-immunoprecipitation assays

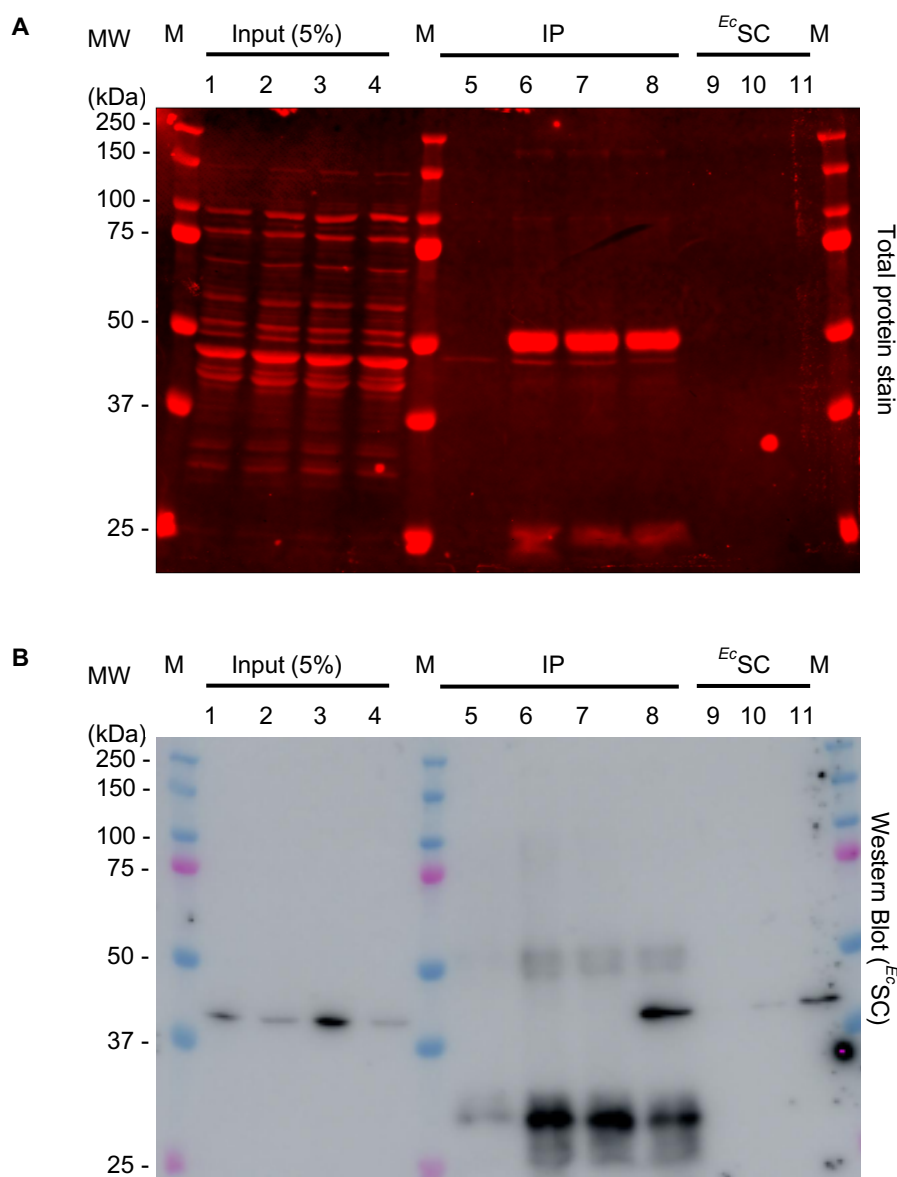

**Fig. SI.5:** Total protein stain (**A**) and *E<sup>c</sup>*SC immuno-detection (**B**) of the immunoprecipitation assays. Lysates from *E. coli* cells exposed to either H<sub>2</sub>O (lanes 1 and 5), FITC-**Py** (lanes 2 and 6), FITC-**Py-P<sub>7</sub>**Scr (lanes 3 and 7) or FITC-**Py-P<sub>7</sub>** (lanes 4 and 8) were processed as described in the Experimental section in the main text. Lanes 9 to 11 were loaded with 5, 10 and 20 ng of purified *E<sup>c</sup>*SC as control.

As shown in Fig. SI.5, there are no major differences between the protein profiles of the different inputs (total protein stain, lanes 1-4 Fig. SI.5A) although some variations in the *E<sup>c</sup>*SC immunodetection assay signals are observed (lanes 1-4 Fig. SI.5B). No unspecific signals are detected in the inputs. Given

the profile of the <sup>E<sub>c</sub></sup>SC standard range (lanes 9-11 Fig. SI.5B) we can estimate the sensitivity of the anti-<sup>E<sub>c</sub></sup>SC Ab246 antibody in the range of 10 ng of <sup>E<sub>c</sub></sup>SC under such conditions and an amount of about 15 to 30 ng of <sup>E<sub>c</sub></sup>SC per input sample. Major bands of about 50 and 25 kDa, corresponding respectively to the molecular weights of Ig heavy and light chains are detected in lanes 6-8 of both images. These signals are attributed to the presence of the goat anti-FITC antibody (ab 19224) in these samples (note that the control sample used to load lane 5 was not exposed to the goat anti-FITC antibody; see the Experimental section in the main text). A faint band, just under the 50 kDa MW marker of unidentified origin is also detected in all four samples treated with protein G sepharose by total protein staining but not by immunodetection (lanes 5-8, Fig. SI.5). Thus, the only anti-<sup>E<sub>c</sub></sup>SC antibody-specific signal is observed in lane 8 (Fig. SI.5B) corresponding to the co-immunoprecipitation of the <sup>E<sub>c</sub></sup>SC bound to the FITC-labelled SC interacting peptide (FITC-Py-P7) by the anti-FITC antibody-protein G complex.

### SI.6: Survival curves of *E. coli* infected *Drosophila melanogaster*

Three independent experiments have been performed (see the Experimental section in the main text). The resulting survival curves and the statistical analysis are presented below.

#### Experiment 1

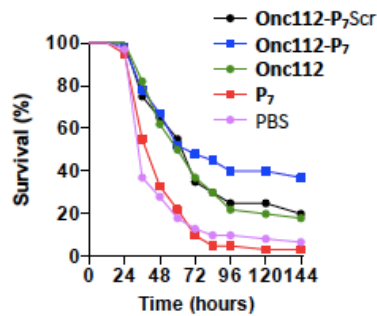

|                                                    |     |                          |
|----------------------------------------------------|-----|--------------------------|
| PBS vs P <sub>7</sub>                              | ns  | P = 0.8869               |
| PBS vs Onc112                                      | *** | P = 0.0002               |
| PBS vs Onc112-P <sub>7</sub>                       | *** | P = 8.7 10 <sup>-7</sup> |
| PBS vs Onc112-P <sub>7</sub> Scr                   | *** | P = 0.0001               |
| Onc112-P <sub>7</sub> vs Onc112                    | ns  | P = 0.0779               |
| Onc112-P <sub>7</sub> vs Onc112-P <sub>7</sub> Scr | ns  | P = 0.1288               |
| Onc112 vs Onc112-P <sub>7</sub> Scr                | ns  | P = 0.8301               |

#### Experiment 2

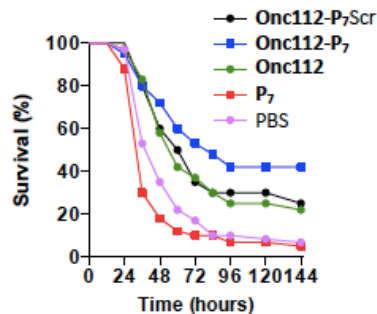

|                                                    |     |                          |
|----------------------------------------------------|-----|--------------------------|
| PBS vs P <sub>7</sub>                              | ns  | P = 0.0590               |
| PBS vs Onc112                                      | **  | P = 0.0012               |
| PBS vs Onc112-P <sub>7</sub>                       | *** | P = 6.7 10 <sup>-7</sup> |
| PBS vs Onc112-P <sub>7</sub> Scr                   | *** | P = 0.0003               |
| Onc112-P <sub>7</sub> vs Onc112                    | *   | P = 0.0307               |
| Onc112-P <sub>7</sub> vs Onc112-P <sub>7</sub> Scr | ns  | P = 0.0780               |
| Onc112 vs Onc112-P <sub>7</sub> Scr                | ns  | P = 0.6924               |

#### Experiment 3

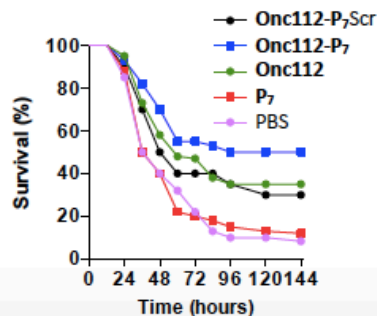

|                                                    |     |                          |
|----------------------------------------------------|-----|--------------------------|
| PBS vs P <sub>7</sub>                              | ns  | P = 0.7828               |
| PBS vs Onc112                                      | *** | P = 0.0003               |
| PBS vs Onc112-P <sub>7</sub>                       | *** | P = 5.5 10 <sup>-7</sup> |
| PBS vs Onc112-P <sub>7</sub> Scr                   | **  | P = 0.0035               |
| Onc112-P <sub>7</sub> vs Onc112                    | ns  | P = 0.1102               |
| Onc112-P <sub>7</sub> vs Onc112-P <sub>7</sub> Scr | ns  | P = 0.0225               |
| Onc112 vs Onc112-P <sub>7</sub> Scr                | ns  | P = 0.5043               |

**Fig. SI.6:** *In vivo* survival assay using *Drosophila melanogaster* infection model.

Seven-day-old female *kenny*<sup>C02831</sup> flies were subjected to septic injury with a thin tungsten needle previously dipped in an *E. coli* suspension diluted in PBS and kept at 29 °C. 1 and 24 hours after injury, 18.4 nl of peptides (1 mM) diluted in PBS or PBS alone were injected into the flies body cavity. Each group was constituted of 60 flies and the experiment was conducted 3 times independently. For each experiment, results were analyzed by log rank analysis with the OASIS online application<sup>5</sup>. \**P* < 0.05, \*\**P* < 0.01, \*\*\**P* < 0.001. ns: not significant.

## References

- 1 P. Wolff, V. Oliéric, J. P. Briand, O. Chaloin, A. Dejaegere, P. Dumas, E. Ennifar, G. Guichard, J. Wagner and D. Y. Burnouf, Structure-Based Design of Short Peptide Ligands Binding onto the *E. coli* Processivity Ring, *J. Med. Chem.*, 2011, **54**, 4627–4637.
- 2 C. André, I. Martiel, P. Wolff, M. Landolfo, B. Lorber, C. Silva da Veiga, A. Dejaegere, P. Dumas, G. Guichard, V. Oliéric, J. Wagner and D. Y. Burnouf, Interaction of a Model Peptide on Gram Negative and Gram Positive Bacterial Sliding Clamps, *ACS Infect. Dis.*, 2019, **5**, 1022–1034.
- 3 D. Y. Burnouf, V. Olieric, J. Wagner, S. Fujii, J. Reinbolt, R. P. P. Fuchs and P. Dumas, Structural and Biochemical Analysis of Sliding Clamp/Ligand Interactions Suggest a Competition Between Replicative and Translesion DNA Polymerases, *J. Mol. Biol.*, 2004, **335**, 1187–1197.
- 4 A. C. Seefeldt, F. Nguyen, S. Antunes, N. Pérébasquine, M. Graf, S. Arenz, K. K. Inampudi, C. Douat, G. Guichard, D. N. Wilson and C. A. Innis, The proline-rich antimicrobial peptide Onc112 inhibits translation by blocking and destabilizing the initiation complex, *Nat. Struct. Mol. Biol.*, 2015, **22**, 470–475.
- 5 J.-S. Yang, H.-J. Nam, M. Seo, S. K. Han, Y. Choi, H. G. Nam, S.-J. Lee and S. Kim, OASIS: Online Application for the Survival Analysis of Lifespan Assays Performed in Aging Research, *PLoS ONE*, 2011, **6**, e23525.
